# Supplementary material for: Facile 3D integration of Si nanowires on Bosch-etched sidewalls for stacked channel transistors
Source: Royal Society of Chemistry journal article supplement (doi:10.1039/c9nr09000b), 2020-01-01
Supplement: c9nr09000b1.pdf [file c9nr09000b1.pdf]

**Supporting Information to**

**Facile 3D integration of Si nanowires on Bosch-etched sidewalls for stacked channel transistors**

Ruijin Hu, Haiguang Ma, Han Yin, Jun Xu, Kunji Chen and Linwei Yu\*

National Laboratory of Solid State Microstructures/School of Electronics Science and Engineering/Collaborative Innovation Center of Advanced Microstructures, Nanjing University, Nanjing, 210093, P. R. China.

Email: [yulinwei@nju.edu.cn](mailto:yulinwei@nju.edu.cn)

**Contents**

**Section 1** Structural characterizations of single silicon nanowire

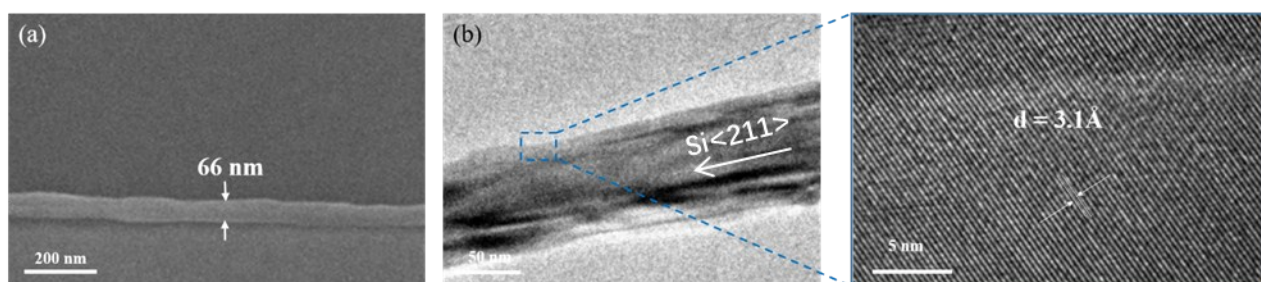

**Fig. S1** (a) and (b) show, respectively, the scanning electron microscopy (SEM) image and the transmission electron microscopy (TEM) images of a selected single SiNW with a diameter of ~66 nm.
